# Supplementary material
Source: PubMed Central journal article supplement (PMC3614132)
Supplement: 11606_2012_2198_MOESM1_ESM.pdf [file 11606_2012_2198_MOESM1_ESM.pdf]

## APPENDIX A: Funnel Plot for Knowledge Outcomes

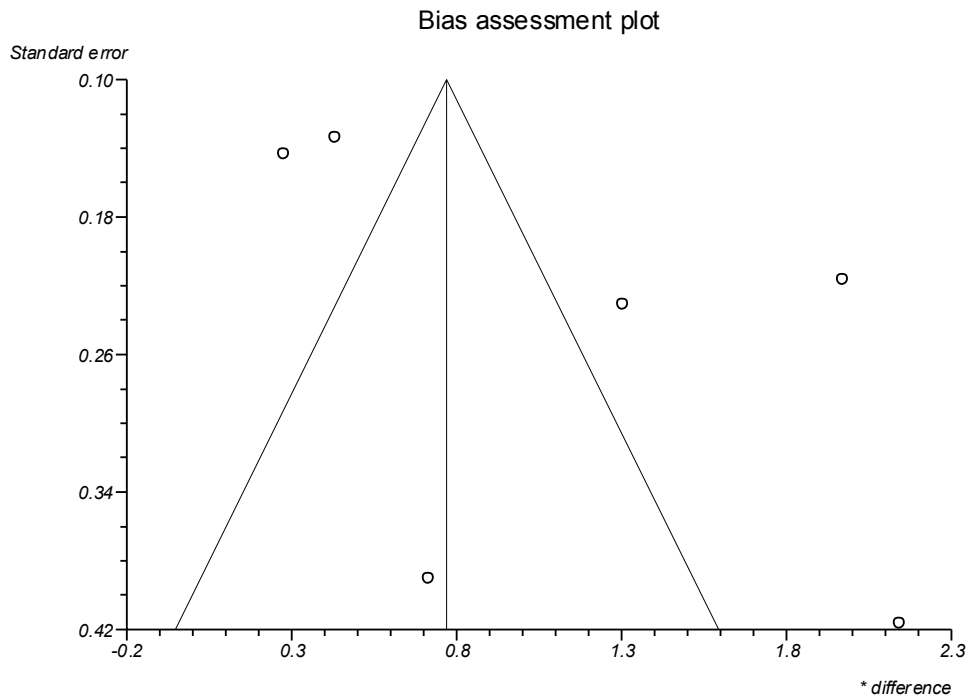

### Legend for Appendix A:

The horizontal axis represents the standardized mean difference. The vertical axis represents the standard error of the mean. Individual study results are represented by the open circles. The vertical line in the plot represents the pooled effect size.
